# Association between alcohol-induced osteonecrosis of femoral head and risk variants of *MMPS* in Han population based on a case-control study

Jianzhong Wang<sup>1,2</sup>, Xugang Shi<sup>3</sup>, Hua Yang<sup>3</sup>, Jieli Du<sup>2</sup>, Yongri Ouyang<sup>1</sup>, Hong Wang<sup>1</sup>, Tianbo Jin<sup>1,3</sup> and Chao Chen<sup>1</sup>

<sup>1</sup> National Engineering Research Center for Miniaturized Detection System, Northwest University, Xi'an, Shaanxi, China

<sup>2</sup> Department of Orthopedics and Traumatology, The 2nd affiliated Hospital of Inner Mongolia University, Hohhot, Inner Mongolia, China

<sup>3</sup> Xi'an Tiangen Precision Medical Research Institute, Xi'an, Shaanxi, China

Correspondence to: Tianbo Jin, email: jintianbo@gmail.com

Chao Chen, email: chenchaoxida@163.com

**Keywords:** MMPs, alcohol-induced ONFH, SNPs, Han population

**Received:** September 07, 2016

**Accepted:** March 09, 2017

**Published:** March 18, 2017

Copyright: Wang et al. This is an open-access article distributed under the terms of the Creative Commons Attribution License 3.0 (CC BY 3.0), which permits unrestricted use, distribution, and reproduction in any medium, provided the original author and source are credited.

## ABSTRACT

The study aimed to evaluate the association between *MMP* gene superfamily and alcohol-induced osteonecrosis of femoral head (alcohol-induced ONFH) risk given its high prevalence, poor therapeutic effect, and serious clinical prognosis. 308 subjects (mean age, 49.47 years; males, 64.0%) who participated in our control group and 300 alcohol-induced ONFH patients (mean age, 43.29 years; males, 99.7%) formed the case group was enrolled to estimate by statistical analysis. We selected 23 single nucleotide polymorphisms (SNPs) from *MMPS*, and performed the chi-squared test, Fisher's exact test, *t*-test and genetic model analyses. From the result, rs243849 which located in *MMP2* were 1.355 (1.014-1.811), 1.34 (1.01-1.78) in allele model and log-addictive model, respectively. And the *p*-value of rs243849 in Cochran-Armitage trend test is 0.044. Unfortunately, the similar results of these SNPs were not observed when adjusted by gender and age. Our study is not enough to supply a positive result to benefit for alcohol-induced ONFH clinical prevention, but guide out a new direction for further experiment.

## BACKGROUND

As one orthopedic clinical common disease, osteonecrosis of the femoral head (ONFH) is a disease of femoral bone marrow cells, fat cells and bone marrow cell degeneration and necrosis caused by different reasons, such as hip trauma, corticosteroid use, alcohol abuse, haemoglobinopathies, bone marrow transplantations, chemotherapy and exposure to radiation [1]. Depending on the different risk factors, we divided it into traumatic and non-traumatic [2]. Some studies found that the main pathogenesis of osteonecrosis is lipid metabolism abnormality [3]. In China, about 7 million people are the patient of osteonecrosis and annually have found 100-200 thousand new cases of ONFH [4]. Overall, the

major patients are young with a long life requirement and excellent functional expectancy.

Excessive alcohol intake over a long period of time may lead to abnormal lipid metabolism in population which is the main risk factor of alcohol-induced ONFH [5, 6]. Some studies showed that the effect of alcohol on ONFH which induces bone marrow stromal cells differentiation into adipocytes. Alcohol induced a significant increase in serum triglyceride and cholesterol levels. Triglyceride deposition in osteocytes leads to pyknosis and an increased percentage of empty osteocyte lacunae that demonstrated intracellular lipid deposition ultimately lead to the death of osteocytes [1]. So far, *MMPS* is a matrix metalloproteinase (MMP) gene family that encoded more than 25 members of proteolytic enzymes family, and they need Ca<sup>2+</sup>, Zn<sup>2+</sup> and other metal

ions as auxiliary when they involve in physiological functions such as cell proliferation, apoptosis and angiogenesis [7]. These enzymes are essential to the process of extracellular matrix degradation. Some studies found that MMP2 (Matrix metalloproteinase-2) and MMP9 expressions suppressed under some pathological conditions which included lipid disturbance [8], and found MMP activity persistent increased in chronic injuries which likely induces the disruption of ultrastructure and tissue function of ECM (The Extracellular Matrix) [9]. As zinc-dependent endopeptidases, MMPs mainly digest collagen and other structural molecules. They directly involved in bone matrix degradation of bone metabolism. Bruni et al. [10] demonstrated that the result in a prostate cancer bone metastases research found varying degrees of osteolytic lesions in bone metastases site where active osteoclast proliferation significantly, and found MMP-9 as a proteolytic enzyme play a role in extracellular matrix degradation of osteoclasts. Viereck et al. [11] found that MMP-2 through the degradation of the bone matrix to start bone resorption and formation in the bone remodeling process. Previous studies indicated that MMPs were associated with bone metabolism disease and some chronic disease. However, the association between MMPs and alcohol-induced ONFH has been less researched.

With the in-depth molecular biology and genetics research of alcohol-induced ONFH, gene polymorphisms opened a new idea for us to study the association between them. In the study, we selected some polymorphisms in *MMPs* to explore the association with alcohol-induced ONFH in Han Chinese population.

## RESULTS

### Baseline characteristics

A total of 608 eligible subjects (300 patients, 308 healthy controls) were included in the study with the average age of  $43.29 \pm 13.08$  and  $49.47 \pm 7.97$  years. Baseline characteristics of the subjects were presented in Supplementary Table 1. From the results of independent samples test, we found age and gender exist statistics significant between case and control group.

### Association between MMPs SNPs and alcohol-induced ONFH risk

The basic information of 23 SNPs on *MMP2-MMP8* which we researched is enumerated in Table 1, including chromosome, position, band, allele, gene and MAF in case and control group. The primer of SNPs was designed by the Sequenom MassARRAY Assay Design 4.0 software [12]. Hardy-Weinberg equilibrium (HWE) which tested by PLINK used the genotype frequencies of control group

proved all SNPs correspond with HWE. And the chi-square test results were shown in Table 2. From the result, we found rs243849 increased alcohol-induced ONFH risk (OR=1.36; 95%CI= 1.01-1.81;  $p=0.04$ ). We from the dominant and recessive model Chi-square result hadn't found significant SNP.

Subsequently, we performed unconditional logistic regression model to calculate the risk allele which using the allele frequencies of the lowest-risk allele in control group. The comparative advantage, odds ratios (OR) and 95% confidence intervals (CI) to assess the association between SNPs in *MMPs* and alcohol-induced ONFH risk in five genetic models which including codominant, dominant, recessive, overdominant and additive model. The results of SNPs in MMP2 shown in Table 3 and others which were not significant shown in Supplementary Table 2. Rs243849 was significant increased alcohol-induced ONFH risk in log-additive model (OR:1.34; 95%: 1.01-1.78;  $p=0.044$ ). After adjustment gender and age, we found no SNP exist statistically significant (Supplementary Table 3).

### Haplotype analysis

We using parameter  $D'$  and  $r^2$  to measure the extent of linkage disequilibrium between SNPs, and according to the control group data to determine the haplotype LD block. From the Pearson Chi-square results, we found the haplotype block consisted by rs243849 and rs243847 exist statistically significant ( $p=0.039$ ) (Figure 1 and Table 4). The result of the unconditional logistic regression model, we didn't find a significant association between different haplotype blocks and alcohol-induced ONFH.

## DISCUSSION

ONFH is a kind of multi-factor and multi-pathology process and is a disease with the outcome of the femoral head weight-bearing area of osteonecrosis. A variety of environmental factors and the complex regulatory network of body affect the occurrence and development of ONFH, such as trauma, alcohol abuse, hormone abuse, smoking, lipid metabolism disorders, fibrinolytic system disorders, cell apoptosis, antioxidant enzymes, bone marrow stem cell damage and genetic diseases. The special and complex distribution of blood vessels in the femoral head and hip joints is the most important part of the load in body, so that various risk factors easily lead to femoral head ischemia. Although there are many causes of ONFH, its pathology process is basically the same. The theory of blood supply damage in the weight-bearing area of the femoral head always dominant in the research of ONFH. There are other theories of the pathogenesis of ONFH, such as the theory of intravascular coagulation abnormalities, osteoblast and osteocyte apoptosis and bone cell fat necrosis.

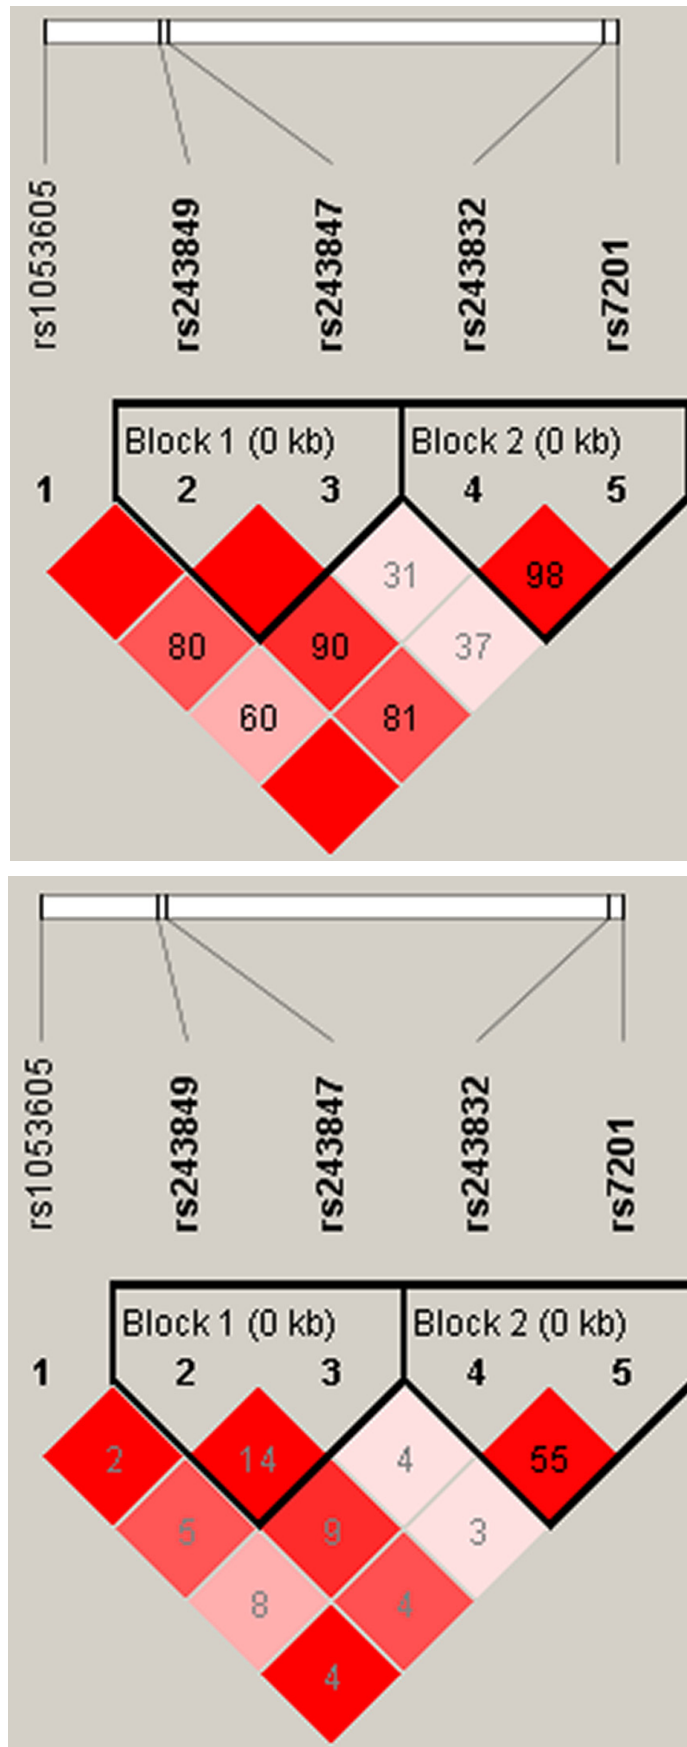

Figure 1: Linkage disequilibrium coefficients (a,  $|D'|$ ) and (b,  $r^2$ ) of the identified haplotype in the *MMP2* gene.

**Table 1: Basic information of SNPs examined in the *MMPs* genes.**

| SNP rs#    | Chr | Position  | Band    | Gene | Allele |   | Case |     |     | Control |     |     | Case  | Control | Cochran-A Trend |
|------------|-----|-----------|---------|------|--------|---|------|-----|-----|---------|-----|-----|-------|---------|-----------------|
|            |     |           |         |      | A      | B | AA   | AB  | BB  | AA      | AB  | BB  | MAF   | MAF     |                 |
| rs14983    | 11  | 102391425 | 11q22.2 | MMP7 | A      | G | 20   | 122 | 158 | 20      | 121 | 167 | 0.270 | 0.261   | 0.730           |
| rs17352054 | 11  | 102393055 | 11q22.2 | MMP7 | C      | A | 5    | 68  | 227 | 5       | 68  | 235 | 0.130 | 0.127   | 0.860           |
| rs10502001 | 11  | 102398593 | 11q22.2 | MMP7 | T      | C | 20   | 122 | 158 | 20      | 121 | 166 | 0.270 | 0.262   | 0.756           |
| rs11568818 | 11  | 102401661 | 11q22.2 | MMP7 | C      | T | 4    | 54  | 242 | 2       | 44  | 262 | 0.103 | 0.078   | 0.126           |
| rs17098318 | 11  | 102402858 | 11q22.2 | MMP7 | A      | G | 4    | 53  | 243 | 2       | 43  | 263 | 0.102 | 0.076   | 0.125           |
| rs3740938  | 11  | 102587062 | 11q22.2 | MMP8 | A      | G | 14   | 108 | 178 | 14      | 103 | 190 | 0.227 | 0.213   | 0.573           |
| rs2012390  | 11  | 102590777 | 11q22.2 | MMP8 | G      | A | 20   | 114 | 165 | 19      | 113 | 176 | 0.258 | 0.245   | 0.620           |
| rs1940475  | 11  | 102593248 | 11q22.2 | MMP8 | T      | C | 43   | 132 | 125 | 35      | 144 | 129 | 0.363 | 0.347   | 0.564           |
| rs11225394 | 11  | 102595413 | 11q22.2 | MMP8 | T      | C | 0    | 65  | 235 | 0       | 53  | 238 | 0.108 | 0.091   | 0.294           |
| rs11225395 | 11  | 102596480 | 11q22.2 | MMP8 | A      | G | 40   | 131 | 129 | 34      | 143 | 131 | 0.352 | 0.343   | 0.739           |
| rs639752   | 11  | 102707339 | 11q22.2 | MMP3 | C      | A | 26   | 135 | 139 | 32      | 146 | 130 | 0.312 | 0.341   | 0.264           |
| rs650108   | 11  | 102708787 | 11q22.2 | MMP3 | G      | A | 47   | 140 | 112 | 47      | 166 | 94  | 0.391 | 0.423   | 0.244           |
| rs520540   | 11  | 102709425 | 11q22.2 | MMP3 | A      | G | 26   | 135 | 139 | 32      | 146 | 130 | 0.312 | 0.341   | 0.264           |
| rs646910   | 11  | 102709522 | 11q22.2 | MMP3 | A      | T | 2    | 42  | 256 | 2       | 46  | 260 | 0.077 | 0.081   | 0.772           |
| rs602128   | 11  | 102713465 | 11q22.2 | MMP3 | A      | G | 26   | 136 | 137 | 32      | 143 | 130 | 0.314 | 0.339   | 0.343           |
| rs679620   | 11  | 102713620 | 11q22.2 | MMP3 | T      | C | 26   | 136 | 138 | 33      | 145 | 130 | 0.313 | 0.343   | 0.266           |
| rs678815   | 11  | 102713777 | 11q22.2 | MMP3 | G      | C | 26   | 134 | 137 | 32      | 146 | 130 | 0.313 | 0.341   | 0.291           |
| rs522616   | 11  | 102715048 | 11q22.2 | MMP3 | C      | T | 49   | 138 | 113 | 40      | 144 | 123 | 0.393 | 0.365   | 0.309           |
| rs1053605  | 16  | 55519607  | 16q12.2 | MMP2 | T      | C | 6    | 62  | 232 | 3       | 63  | 242 | 0.123 | 0.112   | 0.542           |
| rs243849   | 16  | 55523705  | 16q12.2 | MMP2 | T      | C | 17   | 92  | 191 | 9       | 83  | 216 | 0.210 | 0.164   | 0.045           |
| rs243847   | 16  | 55523998  | 16q12.2 | MMP2 | C      | T | 48   | 134 | 118 | 59      | 140 | 109 | 0.383 | 0.419   | 0.221           |
| rs243832   | 16  | 55539191  | 16q12.2 | MMP2 | C      | G | 34   | 150 | 116 | 41      | 145 | 122 | 0.363 | 0.369   | 0.848           |
| rs7201     | 16  | 55539614  | 16q12.2 | MMP2 | C      | A | 12   | 110 | 178 | 18      | 116 | 173 | 0.223 | 0.248   | 0.312           |

**Table 2: The HWE and Chi-square test results in allele and genotype model of SNPs.**

| SNP ID     | Allele |   | HWE<br>p | OR          | Allele           |      | Genotype<br>p | Dominant<br>p | Recessive<br>p |
|------------|--------|---|----------|-------------|------------------|------|---------------|---------------|----------------|
|            | A      | B |          |             | 95% CI           | p    |               |               |                |
| rs14983    | A      | G | 0.8827   | 1.05        | 0.81-1.35        | 0.73 | 0.93          | 0.70          | 0.93           |
| rs17352054 | C      | A | 1        | 1.03        | 0.74-1.44        | 0.86 | 0.98          | 0.86          | 0.78           |
| rs10502001 | T      | C | 0.8826   | 1.04        | 0.81-1.34        | 0.76 | 0.94          | 0.73          | 0.94           |
| rs11568818 | C      | T | 0.7036   | 1.36        | 0.92-2.02        | 0.12 | 0.35          | 0.15          | 0.66           |
| rs17098318 | A      | G | 0.6915   | 1.37        | 0.92-2.04        | 0.12 | 0.35          | 0.15          | 0.66           |
| rs3740938  | A      | G | 1        | 1.08        | 0.82-1.42        | 0.58 | 0.81          | 0.52          | 0.95           |
| rs2012390  | G      | A | 0.8779   | 1.07        | 0.82-1.38        | 0.62 | 0.88          | 0.63          | 0.79           |
| rs1940475  | T      | C | 0.6175   | 1.07        | 0.85-1.36        | 0.56 | 0.52          | 0.96          | 0.27           |
| rs11225394 | T      | C | 0.1469   | 1.21        | 0.83-1.78        | 0.32 | 0.31          | 0.29          | 1.00           |
| rs11225395 | A      | G | 0.7041   | 1.04        | 0.82-1.32        | 0.74 | 0.63          | 0.91          | 0.39           |
| rs639752   | C      | A | 0.3762   | 0.88        | 0.69-1.11        | 0.28 | 0.54          | 0.31          | 0.47           |
| rs650108   | G      | A | 0.07913  | 0.88        | 0.7-1.1          | 0.25 | 0.16          | 0.08          | 0.89           |
| rs520540   | A      | G | 0.3762   | 0.88        | 0.69-1.11        | 0.28 | 0.54          | 0.31          | 0.47           |
| rs646910   | A      | T | 1        | 0.94        | 0.62-1.43        | 0.77 | 0.93          | 0.75          | 0.63           |
| rs602128   | A      | G | 0.5228   | 0.89        | 0.7-1.14         | 0.36 | 0.63          | 0.43          | 0.45           |
| rs679620   | T      | C | 0.5267   | 0.88        | 0.69-1.11        | 0.28 | 0.53          | 0.35          | 0.39           |
| rs678815   | G      | C | 0.3762   | 0.88        | 0.69-1.12        | 0.30 | 0.57          | 0.33          | 0.49           |
| rs522616   | C      | T | 0.9022   | 1.13        | 0.9-1.42         | 0.31 | 0.50          | 0.54          | 0.25           |
| rs1053605  | T      | C | 0.7803   | 1.12        | 0.79-1.58        | 0.54 | 0.58          | 0.71          | 0.48           |
| rs243849   | T      | C | 0.6826   | <b>1.36</b> | <b>1.01-1.81</b> | 0.04 | 0.11          | 0.09          | 0.09           |
| rs243847   | C      | T | 0.2434   | 0.86        | 0.69-1.09        | 0.21 | 0.47          | 0.31          | 0.31           |
| rs243832   | C      | G | 0.9028   | 0.98        | 0.77-1.24        | 0.85 | 0.68          | 0.81          | 0.46           |
| rs7201     | C      | A | 0.879    | 0.87        | 0.67-1.14        | 0.32 | 0.51          | 0.46          | 0.29           |

Values in bold indicate the SNP, which was significant correlated with alcohol-induced ONFH.

**Table 3: Logistic analyses of SNPs association with alcohol-induced ONFH in without adjustment addition.**

| SNP       | Model        | Genotype     | Control     | Alcohol     | OR (95% CI)      | <i>p</i>                |
|-----------|--------------|--------------|-------------|-------------|------------------|-------------------------|
| rs1053605 | Codominant   | C/C          | 242 (78.6%) | 232 (77.3%) | 1                | 0.57                    |
|           |              | C/T          | 63 (20.4%)  | 62 (20.7%)  | 1.03 (0.69-1.52) |                         |
|           |              | T/T          | 3 (1%)      | 6 (2%)      | 2.09 (0.52-8.44) |                         |
|           | Dominant     | C/C          | 242 (78.6%) | 232 (77.3%) | 1                | 0.71                    |
|           |              | C/T-T/T      | 66 (21.4%)  | 68 (22.7%)  | 1.07 (0.73-1.58) |                         |
|           | Recessive    | C/C-C/T      | 305 (99%)   | 294 (98%)   | 1                | 0.29                    |
|           |              | T/T          | 3 (1%)      | 6 (2%)      | 2.07 (0.51-8.37) |                         |
|           | Overdominant | C/C-T/T      | 245 (79.5%) | 238 (79.3%) | 1                | 0.95                    |
|           |              | C/T          | 63 (20.4%)  | 62 (20.7%)  | 1.01 (0.68-1.50) |                         |
|           |              | Log-additive | ---         | ---         | ---              | 1.11 (0.79-1.58)        |
| rs243849  | Codominant   | C/C          | 216 (70.1%) | 191 (63.7%) | 1                | 0.11                    |
|           |              | C/T          | 83 (26.9%)  | 92 (30.7%)  | 1.25 (0.88-1.79) |                         |
|           |              | T/T          | 9 (2.9%)    | 17 (5.7%)   | 2.14 (0.93-4.90) |                         |
|           | Dominant     | C/C          | 216 (70.1%) | 191 (63.7%) | 1                | 0.09                    |
|           |              | C/T-T/T      | 92 (29.9%)  | 109 (36.3%) | 1.34 (0.95-1.88) |                         |
|           | Recessive    | C/C-C/T      | 299 (97.1%) | 283 (94.3%) | 1                | 0.092                   |
|           |              | T/T          | 9 (2.9%)    | 17 (5.7%)   | 2.00 (0.88-4.55) |                         |
|           | Overdominant | C/C-T/T      | 225 (73%)   | 208 (69.3%) | 1                | 0.31                    |
|           |              | C/T          | 83 (26.9%)  | 92 (30.7%)  | 1.20 (0.84-1.70) |                         |
|           |              | Log-additive | ---         | ---         | ---              | <b>1.34 (1.01-1.78)</b> |
| rs243847  | Codominant   | T/T          | 109 (35.4%) | 118 (39.3%) | 1                | 0.47                    |
|           |              | C/T          | 140 (45.5%) | 134 (44.7%) | 0.88 (0.62-1.26) |                         |
|           |              | C/C          | 59 (19.2%)  | 48 (16%)    | 0.75 (0.47-1.19) |                         |
|           | Dominant     | T/T          | 109 (35.4%) | 118 (39.3%) | 1                | 0.31                    |
|           |              | C/T-C/C      | 199 (64.6%) | 182 (60.7%) | 0.84 (0.61-1.17) |                         |
|           | Recessive    | T/T-C/T      | 249 (80.8%) | 252 (84%)   | 1                | 0.31                    |
|           |              | C/C          | 59 (19.2%)  | 48 (16%)    | 0.80 (0.53-1.22) |                         |
|           | Overdominant | T/T-C/C      | 168 (54.5%) | 166 (55.3%) | 1                | 0.85                    |
|           |              | C/T          | 140 (45.5%) | 134 (44.7%) | 0.97 (0.70-1.33) |                         |
|           |              | Log-additive | ---         | ---         | ---              | 0.87 (0.70-1.09)        |
| rs243832  | Codominant   | G/G          | 122 (39.6%) | 116 (38.7%) | 1                | 0.68                    |
|           |              | G/C          | 145 (47.1%) | 150 (50%)   | 1.09 (0.77-1.53) |                         |
|           |              | C/C          | 41 (13.3%)  | 34 (11.3%)  | 0.87 (0.52-1.47) |                         |
|           | Dominant     | G/G          | 122 (39.6%) | 116 (38.7%) | 1                | 0.81                    |
|           |              | G/C-C/C      | 186 (60.4%) | 184 (61.3%) | 1.04 (0.75-1.44) |                         |
|           | Recessive    | G/G-G/C      | 267 (86.7%) | 266 (88.7%) | 1                | 0.46                    |
|           |              | C/C          | 41 (13.3%)  | 34 (11.3%)  | 0.83 (0.51-1.35) |                         |
|           | Overdominant | G/G-C/C      | 163 (52.9%) | 150 (50%)   | 1                | 0.47                    |
|           |              | G/C          | 145 (47.1%) | 150 (50%)   | 1.12 (0.82-1.55) |                         |

|        |              |         |             |             |                  |      |
|--------|--------------|---------|-------------|-------------|------------------|------|
| rs7201 | Log-additive | ---     | ---         | ---         | 0.98 (0.77-1.24) | 0.85 |
|        | Codominant   | A/A     | 173 (56.4%) | 178 (59.3%) | 1                | 0.51 |
|        |              | C/A     | 116 (37.8%) | 110 (36.7%) | 0.92 (0.66-1.29) |      |
|        |              | C/C     | 18 (5.9%)   | 12 (4%)     | 0.65 (0.30-1.39) |      |
|        | Dominant     | A/A     | 173 (56.4%) | 178 (59.3%) | 1                | 0.46 |
|        |              | C/A-C/C | 134 (43.6%) | 122 (40.7%) | 0.88 (0.64-1.22) |      |
|        | Recessive    | A/A-C/A | 289 (94.1%) | 288 (96%)   | 1                | 0.29 |
|        |              | C/C     | 18 (5.9%)   | 12 (4%)     | 0.67 (0.32-1.41) |      |
|        | Overdominant | A/A-C/C | 191 (62.2%) | 190 (63.3%) | 1                | 0.78 |
|        |              | C/A     | 116 (37.8%) | 110 (36.7%) | 0.95 (0.69-1.32) |      |
|        | Log-additive | ---     | ---         | ---         | 0.87 (0.66-1.14) | 0.31 |

Values in bold indicate that the locus has statistically significant.

Recently, the amount of study researches ONFH related gene SNP hereditary molecular etiology to clarify the genetic molecular mechanism of ONFH. Bjorkman A et.al for the first time proved that the blood coagulation factor V (G1691A) is positively correlated with ONFH [13, 14]. The research of Kim et.al verified that rs2227631, rs1799889, and rs11178 which located in *PAL-1* (Plasminogen-activating inhibitor-1) are significantly associated with the risk of ONFH [15]. Zhang et.al researched that association between *eNOS* with ONFH, found G894T in *eNOS* is associated with ONFH risk [16]. Amount of researches explored the relationship between genetic polymorphism and ONFH risk, found a lot of gene including *ANXs* (annexins), *VEGF* (vascular endothelial growth factor), *HIF-1* (Hypoxia-inducible factor-1), Apolipoproteins B (*ApoB*) and apolipoproteins A1 (*ApoA1*) are associated with ONFH.

Scientists have found more than 20 different kinds of MMPs, proved that they can degrade the extracellular matrix. There are some studies proved that MMPs participates the process of bone metabolism and occupies a certain position in the pathology of some diseases, such as lipid metabolic disorders, inflammation and malignant [17-19]. In our study, we only found rs243849 which located in MMP2 were significant with increased alcohol-induced ONFH in without adjustment models and the association is not significant after adjustment. We found age and gender are the effective confounding factors in case and control group. After adjustment, the association between SNPs and alcohol-induced ONFH were not significant, which might be partly attributed to sample size that is still small and gender distribution that is unbalanced for female.

In normal physiological conditions, as a complicated process that human bone metabolism including two important parts: bone resorption and bone formation. The interaction among bone cells, blood cells, and stroma cells consists of the metabolism process of bone. Two

kinds of cells including osteoclasts and osteoblasts which differentiated from bone marrow stroma cells (BMSCs) play an important role in the metabolism process of bone [20]. The process of osteoblasts acts in the compound bone matrix and osteoclasts participates in bone resorption preserve a dynamic balance to maintain the normal physiological state of bone. If the dynamic equilibrium of bone metabolism lost, orthopedic diseases will occur.

Some previous researches confirmed that the good osteogenic function of BMSCs is existence about patients with alcohol-induced ONFH [21, 22]. Our research aimed to explore the affection power of genetic factors for alcohol-induced ONFH. MMPs is secreted by osteoblasts and activate osteoclasts meantime. We explored the function of 23 SNPs located in *MMP2—MMP8* to detect the mechanism of alcohol-induced ONFH. The expression of MMP2 and MMP7 were significantly upregulated when patients with ONFH, which means the decreased capacity of repair capacity and altered bone remodeling [23]. In the research of Seiya Jingushi also found MMP3 is increased in the disease process, further know that the concentration of MMP3 is higher in early stage disease than in later stage disease [24]. MMPs overexpressed may accelerate the apoptosis of bone and bone matrix degradation and promote bone resorption which leads to bone trabecular thinning, osteoporosis, atrophy or broken bone cannot withstand normal stress load [25, 26]. Bone trabecular microfracture led to microvascular damage and trabecular micro-circulation interruption which combined with lipid metabolism disorders and abnormal blood clotting mechanisms lead to ONFH. Based on the differences of osteogenic and adipogenic differentiation, one study found that the BMSCs adipocytes capability of patients with alcohol-induced ONFH higher than femoral neck fracture patients, however, found osteogenic differentiation function is below the femoral neck fracture [27, 28]. That further evidence the altered differentiation function may be one of the pathogenesis of alcohol-induced ONFH.

**Table 4: Haplotype association with response of rs243849 and rs243847.**

| Haplotype | Freq. | Case, Control Ratio Counts   | Case, Control Fre | Chi   | <i>p</i>     |
|-----------|-------|------------------------------|-------------------|-------|--------------|
| CT        | 0.412 | 244.0 : 356.0, 257.0 : 359.0 | 0.407, 0.417      | 0.139 | 0.709        |
| CC        | 0.401 | 230.0 : 370.0, 258.0 : 358.0 | 0.383, 0.419      | 1.594 | 0.207        |
| TT        | 0.187 | 126.0 : 474.0, 101.0 : 515.0 | 0.210, 0.164      | 4.243 | <b>0.039</b> |

Rico et al. reported that alcohol-induced ONFH induced by alcohol stimulate the excessive secretion of adrenal glucocorticoids, and found that alcohol and hormones may stimulate ONFH through a common pathway [29, 30]. Alcohol caused lipid metabolism the abnormal increase of fatty substance in blood circulation which gathered into a ball of fat, lead to reduced blood flow speed, clogging capillaries and causing the femoral head microvascular thrombosis, eventually leading to ONFH [31, 32].

From the above, we first obtained one hypothesis that alcohol like the mechanism of a hormone that directly induces MMPs gene express to change the BMSCs differentiation direction which caused BMSCs differentiate into adipocytes and osteoclasts, reduced its osteoblast differentiation. And on the other hand, the abnormal lipid metabolism is the other pathology mechanism of alcohol-induced ONFH.

## CONCLUSIONS

We only found rs243849 was significant increased alcohol-induced ONFH risk in allele and log-additive model. But after adjustment, the result was not further verified. The limitations of our study should be mentioned. All the samples that were from Han population who lived in Zhengzhou city and around area. The confounding factors of the population may cause type I error (false positive). The gender ratio imbalance may be the other factor which leads to the not statistically significant results.

## MATERIALS AND METHODS

### Ethics statement

The research protocol was performed according the principles of the Declaration of Helsinki and was consented by the Medical Ethical Committee of Zhengzhou Traditional Chinese Medicine Traumatology Hospital. In the initial stage, the recruited participants agreed to provide baseline blood samples and questionnaire information. Written informed consent was obtained from all volunteers and study protocols were

performed in accordance with the regular guideline.

### Study participants

The study subjects were derived from Zhengzhou Traditional Chinese Medicine Traumatology Hospital up to January 2016 from September 2014 which recruited a total of 608 individuals including 300 patients and 308 healthy controls for our case-control study. These controls did not have osteonecrosis and other related diseases. They were all Han Chinese and lived in Zhengzhou city or the surrounding area. We selected them from September 2014 to January 2016 in Zhengzhou Traditional Chinese Medicine Traumatology Hospital. Combined the normal epidemiological investigation, the sample of case group were chosen based on the clinical manifestations such as hip pain, activity limitation of hip, lower limb muscle atrophy of the sick side, and combined with the videography examination, higher density shadows, rupture of the joint surface, or bumpiness and narrowness of the hip joint etc.. When patients without X-ray changed, magnetic resonance imaging (MRI) was used to make a definite diagnosis. The exclusion criteria were: (1) Individuals suffering from serious primary diseases and required steroid treatment for replacement. (2) It did not satisfy the diagnostic criteria of alcohol-induced ONFH, patients diagnosed with traumatic osteonecrosis or other hip diseases. (3) Patients affected by drugs that cause liver disease or dyslipidemia.

### SNP selection and genotyping

We selected these 23 validated SNPs which had an MAF > 5% in the HapMap Asian population (CHB and JPT). Based on the public databases: dbSNP (<https://www.ncbi.nlm.nih.gov/projects/SNP/>) and HapMap (<http://www.hapmap.org/>), SNPs was selected from these dense tagging of SNPs which has the linkage disequilibrium (LD) blocks within *MMPs* gene and deleted some loci which call rate <0.9 in the experiment. Venous blood samples (5 mL) were collected from every person in our examination. DNA was extracted from whole blood samples using a genomic DNA purification kit (GoldMag, China), and the blood was stored with a condition of -20°C. The DNA concentration was measured by spectrometry (DU530 UV/

VIS spectrophotometer, Beckman Instruments, Fullerton, CA, USA). The Sequenom MassARRAY Assay Design 4.0 software (Sequenom, Inc, San Diego, CA, USA) was used to design the Multiplexed SNP Mass EXTEND assay [12]. Genotyping *MMPS* SNPs were performed using a Sequenom MassARRAY RS1000 (Sequenom, Inc.) according to the standard protocol.

### Statistical analysis

The SequenomTyper 4.0 Software™ (Sequenom, Inc.) was used to manage and analyze the data. Categorical variables were presented as percentages (%) and continuous variables were expressed as mean±SD. We performed the comparison of variables using variance analysis for continuous variables and chi-square tests for categorical variables. The univariate and multivariable logistic regression models were used to examine the association between case and control, and corresponding odds ratios (ORs) and 95% confidence intervals (CIs) were calculated simultaneously. Potential confounders influencing the risk of alcohol-induced ONFH that were adjusted in the multivariable models were social-demographic variables (age, sex) that we knew and without other diseases history (coronary heart disease, diabetes, hypertension disease, tumor etc.). All statistical analysis was carried out using SPSS19.0 statistical software (SPSS, Chicago, IL) and Microsoft Excel, and a two-tailed *P* value of <0.05 was considered statistically significant. PLINK software (<http://pngu.mgh.harvard.edu/purcell/plink/>) was used by four models (dominant, recessive, codominant and log-additive models) to evaluate the case-control association about 23 SNPs and alcohol-induced ONFH risk. Lastly, Haploview software (version 4.2) was performed to analyses Linkage disequilibrium (LD).

### Abbreviations

MMP = matrix metalloproteinase, alcohol-induced ONFH = alcohol-induced osteonecrosis of femoral head, BMSC = bone marrow stroma cell, CIs = confidence intervals, HWE = Hardy-Weinberg equilibrium, MAF = minor allele frequency, ORs = odds ratios, SNPs = single nucleotide polymorphisms, ANXS = annexins, VEGF = vascular endothelial growth factor, HIF-1 = Hypoxia-inducible factor-1, Apo = Apolipoproteins.

### CONFLICTS OF INTEREST

The authors have no conflicts of interest to report.

### GRANT SUPPORT

The authors are responsible for all the content and

grateful to all the volunteers in this study. This work was supported by the National Natural Science Foundation of China (No. 81260284, 81660378) and China Postdoctoral Science Foundation (2015M572594). The funders had no participate in the entire process of the manuscript.

### REFERENCES

1. Seamon J, Keller T, Saleh J, Cui Q. The Pathogenesis of Nontraumatic Osteonecrosis. *Alcohol*. 2012; 54:74.
2. Wang Y, Cao Y, Li Y, Guo Y, Wang Q, Yang M, Zhang N, Jin T, Wang J. Genetic association of the ApoB and ApoA1 gene polymorphisms with the risk for alcohol-induced osteonecrosis of femoral head. *Int J Clin Exp Pathol*. 2015; 8:11332.
3. Gangji V, De Maertelaer V, Hauzeur JP. Autologous bone marrow cell implantation in the treatment of non-traumatic osteonecrosis of the femoral head: Five year follow-up of a prospective controlled study. *Bone*. 2011; 49:1005-1009.
4. Yin JM, Liu Z, Zhao SC, Guo YJ, Liu ZT. Relationship between the Apolipoprotein AI, B gene polymorphism and the risk of non-traumatic osteonecrosis. *Lipids Health Dis*. 2014; 13:1.
5. Hirota Y, Hirohata T, Fukuda K, Mori M, Yanagawa H, Ohno Y, Sugioka YI. Association of alcohol intake, cigarette smoking, and occupational status with the risk of idiopathic osteonecrosis of the femoral head. *Am J Epidemiol*. 1993; 137:530-538.
6. Matsuo K, Hirohata T, Sugioka Y, Ikeda M, Fukuda A. Influence of alcohol intake, cigarette smoking, and occupational status on idiopathic osteonecrosis of the femoral head. *Clin Orthop Relat Res*. 1988; 234:115-123.
7. Perez N, Ostoji S, Volk M. Matrix metalloproteinases 1, 2, 3 and 9 functional single-nucleotide polymorphisms in idiopathic recurrent spontaneous abortion. *Reproductive Biomedicine Online*. 2012; 24:567-575.
8. Xu C, Huang Z, Liu L, Luo C, Lu G, Li Q, Gao X. Zinc Regulates Lipid Metabolism and MMPs Expression in Lipid Disturbance Rabbits. *Biol Trace Elem Res*. 2015; 168:411-420.
9. Davis ME, Gumucio JP, Sugg KB, Bedi A, Mendias CL. MMP inhibition as a potential method to augment the healing of skeletal muscle and tendon extracellular matrix. *J Appl Physiol*. 2013; 115:884-891.
10. Bruni-Cardoso A, Johnson LC, Vessella RL, Peterson TE, Lynch CC. Osteoclast-Derived Matrix Metalloproteinase-9 Directly Affects Angiogenesis in the Prostate Tumor–Bone Microenvironment. *Mol Cancer Res*. 2010; 8:459-470.
11. Viereck V, Emons G, Lauck V, Frosch KH, Blaschke S, Gründker C, Hofbauer LC. Bisphosphonates pamidronate and zoledronic acid stimulate osteoprotegerin production by primary human osteoblasts. *Biochem Biophys Res Commun*. 2002; 291:680-686.
12. Trembizki E, Smith H, Lahra MM, Chen M, Donovan B,



- Fairley CK, Guy R, Kaldor J, Regan D, Ward J. High-throughput informative single nucleotide polymorphism-based typing of *Neisseria gonorrhoeae* using the Sequenom MassARRAY iPLEX platform. *J Antimicrob Chemother.* 2014; 69:1526-1532.
13. Björkman A, Burtscher IM, Svensson PJ, Hillarp A, Besjakov J, Benoni G. Factor V Leiden and the prothrombin 20210A gene mutation and osteonecrosis of the knee. *Arch Orthop Trauma Surg.* 2005; 125:51-55.
  14. Björkman A, Svensson PJ, Hillarp A, Burtscher IM, Rünow A, Benoni G. Factor V Leiden and prothrombin gene mutation: risk factors for osteonecrosis of the femoral head in adults. *Clin Orthop Relat Res.* 2004; 425:168-172.
  15. Kim HO, Cho CH, Cho YJ, Cho SH, Yoon KS, Kim KI. Significant associations of PAI-1 genetic polymorphisms with osteonecrosis of the femoral head. *BMC Musculoskelet Disord.* 2011; 12:160.
  16. Zhang Y, Wang R, Li S, Kong X, Wang Z, Chen W, Na L. Genetic polymorphisms in plasminogen activator inhibitor-1 predict susceptibility to steroid-induced osteonecrosis of the femoral head in Chinese population. *Diagnostic Pathology.* 2013; 8:169.
  17. Kourkoutas D, Buys YM, Flanagan JG, Karamaounas N, Georgopoulos G, Iliakis E, Moschos MM, Trope GE. Clinical Significance of Optic Disc Progression by Topographic Change Analysis Maps in Glaucoma: An 8-Year Follow-Up Study. *Journal of Ophthalmology.* 2014; 2014:987389-987389.
  18. Taylor SL, Rogers GB, Chen AC, Burr LD, McGuckin MA, Serisier DJ. Matrix metalloproteinases vary with airway microbiota composition and lung function in non-cystic fibrosis bronchiectasis. *Annals of the American Thoracic Society.* 2015; 12:701-707.
  19. Zhang S, Zhong B, Chen M, Yang L, Yang G, Li Y, Wang H, Wang G, Li W, Cui J, Hoffman AR, Hu J. Epigenetic reprogramming reverses the malignant epigenotype of the MMP/TIMP axis genes in tumor cells. *International Journal of Cancer.* 2014; 134:1583-1594.
  20. Heino TJ, Hentunen TA. Differentiation of osteoblasts and osteocytes from mesenchymal stem cells. *Curr Stem Cell Res Ther.* 2008; 3:131-145.
  21. Yoo JJ, Song WS, Koo KH, Kang SY, Kim HJ. Osteogenic abilities of bone marrow stromal cells are not defective in patients with osteonecrosis. *Int Orthop.* 2009; 33:867-872.
  22. Gao YS, Zhang CQ. Comment on: Osteogenic abilities of bone marrow stromal cells are not defective in patients with osteonecrosis. *Int Orthop.* 2010; 34:457-457.
  23. Grässel S, Beckmann J, Rath B, Vogel M, Grifka J, Tingart M. Expression profile of matrix metalloproteinase-2 and -9 and their endogenous tissue inhibitors in osteonecrotic femoral heads. *Int J Mol Med.* 2010; 26:127-133.
  24. Jingushi S, Lohmander L, Shinmei M, Hoerrner L, Lark M, Sugioka Y, Iwamoto Y. Markers of joint tissue turnover in joint fluids from hips with osteonecrosis of the femoral head. *J Orthop Res.* 2000; 18:728-733.
  25. Shi J, Son MY, Yamada S, Szabova L, Kahan S, Chrysovergis K, Wolf L, Surmak A, Holmbeck K. Membrane-type MMPs enable extracellular matrix permissiveness and mesenchymal cell proliferation during embryogenesis. *Dev Biol.* 2008; 313:196-209.
  26. Viereck V, Emons G, Lauck V, Frosch KH, Blaschke S, Gründker C, Hofbauer LC. Bisphosphonates Pamidronate and Zoledronic Acid Stimulate Osteoprotegerin Production by Primary Human Osteoblasts. *Biochem Biophys Res Commun.* 2002; 291:680-686.
  27. Wang Y, Li Y, Mao K, Li J, Cui Q, Wang GJ. Alcohol-induced adipogenesis in bone and marrow: a possible mechanism for osteonecrosis. *Clin Orthop Relat Res.* 2003; 410:213-224.
  28. Potier E, Noailly J, Ito K. Directing bone marrow-derived stromal cell function with mechanics. *J Biomech.* 2010; 43:807-817.
  29. Rico H, Gomez-Castresana F, Cabranes JA, Almoguera I, Duran LL, Matute JA. Increased blood cortisol in alcoholic patients with aseptic necrosis of the femoral head. *Calcif Tissue Int.* 1985; 37:585-587.
  30. Lee JS, Lee JS, Roh HL, Kim CH, Jin SJ, Suh KT. Alterations in the differentiation ability of mesenchymal stem cells in patients with nontraumatic osteonecrosis of the femoral head: comparative analysis according to the risk factor. *J Orthop Res.* 2006; 24:604-609.
  31. Suh KT, Kim SW, Roh HL, Youn MS, Jung JS. Decreased Osteogenic Differentiation of Mesenchymal Stem Cells in Alcohol-induced Osteonecrosis. *Clin Orthop Relat Res.* 2005; 431:220-225.
  32. Holmes T. Association of alcohol intake, cigarette smoking, and occupational status with the risk of idiopathic osteonecrosis of the femoral head. *Am J Epidemiol.* 1993; 137:530-538.
